# Supplementary material
Source: ML conference proceedings conference paper supplement (https://openaccess.thecvf.com/content/CVPR2021/html/Xiang_NeuTex_Neural_Texture_CVPR_2021_paper.html)
Supplement: Supplementary file 2 [file Xiang_NeuTex_Neural_Texture_CVPR_2021_supplemental.zip]

Archive with 3 entries (2 files):
- 05041-supp/
- 05041-supp/neutex-supp.mp4
- 05041-supp/neutex-supp.pdf
